# Supplementary material for: Impact of genetic alterations on central nervous system progression of primary vitreoretinal lymphoma
Source: PubMed Central journal article supplement — Haematologica. 2024 Jun 6;109(11):3641–9. doi: 10.3324/haematol.2023.284953 (PMC11532695; doi:10.3324/haematol.2023.284953), 2024-06-06
Supplement: 2023_284953_YOSHIFUJI_SUPPL.pdf [file 2023_284953_YOSHIFUJI_SUPPL.pdf]

# Impact of genetic alterations on central nervous system progression of primary vitreoretinal lymphoma

Kota Yoshifuji,<sup>1\*</sup> Daichi Sadato,<sup>2\*</sup> Takashi Toya,<sup>3</sup> Yotaro Motomura,<sup>1</sup> Chizuko Hirama,<sup>2</sup> Hiroshi Takase,<sup>4</sup> Kouhei Yamamoto,<sup>5</sup> Yuka Harada,<sup>6</sup> Takehiko Mori<sup>1</sup> and Toshikage Nagao<sup>1</sup>

<sup>1</sup>Department of Hematology, Graduate School of Medical and Dental Sciences, Tokyo Medical and Dental University (TMDU); <sup>2</sup>Clinical Research Support Center, Tokyo Metropolitan Komagome Hospital; <sup>3</sup>Hematology Division, Tokyo Metropolitan Komagome Hospital;

<sup>4</sup>Department of Ophthalmology and Visual Science, Graduate School of Medical and Dental Sciences, Tokyo Medical and Dental University (TMDU); <sup>5</sup>Department of Pathology, Graduate School of Medical and Dental Sciences, Tokyo Medical and Dental University and <sup>6</sup>Clinical Laboratory, Tokyo Metropolitan Komagome Hospital, Tokyo, Japan

*\*KYo and DS contributed equally as first authors.*

**Correspondence:** K. Yoshifuji  
[yoshhema@tmd.ac.jp](mailto:yoshhema@tmd.ac.jp)

**Received:** January 1, 2024.

**Accepted:** May 24, 2024.

**Early view:** June 6, 2024.

<https://doi.org/10.3324/haematol.2023.284953>

©2024 Ferrata Storti Foundation

Published under a CC BY-NC license

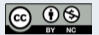

## Supplementary data

### Supplemental Method

#### *Treatment for the patients*

All patients underwent initial treatment with weekly intravitreal MTX injections (400  $\mu\text{g}/100 \mu\text{L}$ ) in the affected eyes until the lesions resolved. Thereafter, systemic HD-MTX (3.5 g/m<sup>2</sup> every other week for a total of five cycles) was administered to 20/36 patients, and the remainder were carefully observed without any additional chemotherapy, according to the decision of the physician. If the treatment was not tolerated, it was discontinued at the discretion of the physician.

#### *Flow cytometry analysis*

The infiltrating cells were isolated from the vitreous humor and obtained for flow cytometry. The surface expression of B-cell markers (CD19 and CD20), T-cell markers (CD3, CD4, CD5, and CD8), and  $\kappa$  and  $\lambda$  light chains were examined. Using the criteria suggested by Levy et al.<sup>1</sup>, we defined a monoclonal  $\kappa$  population as one where the  $\kappa/\lambda$  ratio was 3:1 or greater, and monoclonal  $\lambda$  population as one that had a  $\lambda/\kappa$  ratio in excess of 2:1.

#### *PCR analysis of IGH rearrangement*

PCR analysis of IGH rearrangement was outsourced to LSI Medience Corporation (Tokyo, Japan).

#### *Cytokine measurement*

The IL-6 and IL-10 concentrations in a vitreous humor were measured at our laboratory and SRL Corporation (Tokyo, Japan). In total, 50  $\mu\text{L}$  of vitreous supernatant from each patient was used for ELISA according to the given manufacturer instructions (Invitrogen, Camarillo, CA, USA).

#### *Amplicon-based targeted sequencing*

The custom gene panel of 107 genes frequently mutated in lymphoma, and PVRL was designed using Illumina Design Studio. Covered bases were 406,093 bp, and there were 3,044 (5–157 amplicons/gene)

designed panel amplicons. This custom gene panel was designed to cover all exons of each gene on genomic DNA. As a template, 10 ng DNA amplified the target genes. Libraries were synthesized using AmpliSeq Library Plus for Illumina (Illumina, San Diego, CA, USA). The libraries were analyzed using MiSeq Reagent Kit v2 (500 cycles) with MiSeq (Illumina) platform following the provided manufacturer instructions.

#### *Whole exome sequencing*

Genomic DNA capture, enrichment, and elution were performed using Agilent SureSelect Human V6 (Agilent Technologies, Santa Clara, CA) following protocols by the manufacturer. In total, 600 ng of each genomic DNA sample was used as bait. After ligation on adaptor oligonucleotides, tail repairing, and purification, libraries were quantified by qPCR to obtain an adequate DNA template for sequencing. Synthesized libraries were sequenced on the NovaSeq 6000 (Illumina) as 150 bp pair-ended reads. Sequencing was performed by Rhexia (Tokyo, Japan).

#### *Gene variant discovery*

Fastq files from next-generation sequencing were cleaned with Trimmomatic,<sup>2</sup> and the results were aligned to the human reference genome, hg19, using Burrows–Wheeler Alignment (BWA)<sup>3</sup>. Qualimap<sup>4</sup> was used to analyze coverages of mapped reads. Gene variants were detected using HaplotypeCaller included in the GATK tool<sup>5</sup>. Gene variants obtained from HaplotypeCaller were filtered with the parameters of quality/depth, mapping quality, and strand bias to exclude false-positive variants.<sup>6</sup> Variants were annotated with information from the Refseq, 1000G, and Exac databases in Illumina VariantStudio 3.0 software (Illumina). Variants with a prevalence of >1% in each regional population were excluded. COSMIC and CLINVAR databases and previous genomics research papers (Table S1) were referred to judge whether the variants were pathogenic or not.

#### *Detection of copy number alteration*

Copy number alteration for each PVRL sample were analyzed using CNVkit<sup>7</sup> with bam files generated by the mapping process of gene variant discovery. Consequently, the normalized coverage values of PVRL data were compared to that of uveitis cases as controls and gene copy numbers were obtained. During the

calculation process, the number of amplicons and the  $\log_2$  value in control data ( $-5$  or less) and spread of read depth (1 or more) were applied as a filter, resulting in copy number of read depth (20 or more) with low spread read depth gene regions. The  $\log_2$  copy number of  $>0.25$  was decided as gain and the  $\log_2$  copy number less than  $-0.25$  was considered as loss. CNA of *HIST1H1B*, *HIST1H1C*, *HIST1H1E*, *HIST1H4H*, and *SOCS1* were excluded from the analysis because the copy number variation between the samples was too large. In the annotation process, copy number gain of oncogene and loss of tumor suppressor gene were defined as pathogenic and incorporated into analysis. Genes with the gain of function mutations had oncogenic function were considered as oncogenes, and genes with the loss of function mutations contributed to tumorigenic pathway were considered as tumor suppressor genes (Table S1).

**Table S1.** Target genes included in the sequencing panel of 107 genes and the reference used for gene annotation

| Gene           | Mutation effect  | Characteristics of mutations                                           | Reference                                                                                                         |
|----------------|------------------|------------------------------------------------------------------------|-------------------------------------------------------------------------------------------------------------------|
| <i>ACTB</i>    | N.I.             | Missense in N-terminal                                                 | Lohr et al <sup>8</sup> , Wang et al <sup>9</sup>                                                                 |
| <i>APC</i>     | Loss of function | -                                                                      | Zhang et al <sup>10</sup> , Schmitz et al <sup>11</sup>                                                           |
| <i>ARID1A</i>  | Loss of function | -                                                                      | Zhang et al <sup>10</sup> , Schmitz et al <sup>11</sup>                                                           |
| <i>ARID2</i>   | Loss of function | -                                                                      | Wang et al <sup>9</sup>                                                                                           |
| <i>AXIN1</i>   | N.I.             | -                                                                      | Wang et al <sup>9</sup>                                                                                           |
| <i>ATM</i>     | Loss of function | -                                                                      | Schmitz et al <sup>11</sup>                                                                                       |
| <i>B2M</i>     | Loss of function | -                                                                      | Challa-Malladi et al <sup>12</sup> , Schmitz et al <sup>11</sup>                                                  |
| <i>BCL10</i>   | N.I.             | -                                                                      | Morin et al <sup>13</sup> , Schmitz et al <sup>11</sup>                                                           |
| <i>BCL2</i>    | Gain of function | -                                                                      | Morin et al <sup>13</sup> , Wang et al <sup>9</sup>                                                               |
| <i>BCL6</i>    | N.I.             | -                                                                      | Morin et al <sup>13</sup> , Schmitz et al <sup>11</sup>                                                           |
| <i>BCL7A</i>   | Loss of function | Missense in N-terminal                                                 | Schmitz et al <sup>11</sup> , Baliñas-Gavira et al <sup>14</sup>                                                  |
| <i>BRCAl</i>   | Loss of function | -                                                                      | Wang et al <sup>9</sup>                                                                                           |
| <i>BRAF</i>    | Gain of function | Missense in hotspot (e.g. V600)                                        | Schmitz et al <sup>11</sup>                                                                                       |
| <i>BTG1</i>    | Loss of function | Missense in N-terminal                                                 | Lee et al <sup>15</sup> , Bonzheim et al <sup>16</sup> , Mlynarczyk et al <sup>17</sup>                           |
| <i>BTG2</i>    | Loss of function | Missense in N-terminal                                                 | Lee et al <sup>15</sup> , Bonzheim et al <sup>16</sup> , Wang et al <sup>9</sup> , Mlynarczyk et al <sup>17</sup> |
| <i>CACNA1C</i> | N.I.             | -                                                                      | Lee et al <sup>15</sup>                                                                                           |
| <i>BTK</i>     | Loss of function | -                                                                      | Lohr et al <sup>8</sup> , Schmitz et al <sup>11</sup> , Hu et al <sup>18</sup>                                    |
| <i>CCND3</i>   | Loss of function | Missense in C-terminal hotspot                                         | Morin et al <sup>13</sup> , Schmitz et al <sup>19</sup> , Schmitz et al <sup>11</sup>                             |
| <i>CD274</i>   | Gain of function | -                                                                      | Kataoka et al <sup>20</sup> , Schmitz et al <sup>11</sup>                                                         |
| <i>CD58</i>    | Loss of function | -                                                                      | Challa-Malladi et al <sup>12</sup> , Schmitz et al <sup>11</sup>                                                  |
| <i>CD70</i>    | Loss of function | -                                                                      | Schmitz et al <sup>11</sup>                                                                                       |
| <i>CD79A</i>   | Gain of function | Missense in immunoreceptor tyrosine-based activation motif             | Davis et al <sup>21</sup> , Schmitz et al <sup>11</sup>                                                           |
| <i>CD79B</i>   | Gain of function | Missense in immunoreceptor tyrosine-based activation motif (e.g. Y196) | Davis et al <sup>21</sup> , Bonzheim et al <sup>16</sup> , Wang et al <sup>9</sup>                                |
| <i>CDKN2A</i>  | Loss of function | -                                                                      | Nayyar et al <sup>22</sup> , Wang et al <sup>9</sup>                                                              |
| <i>CDKN2B</i>  | Loss of function | -                                                                      | Nayyar et al <sup>22</sup> , Wang et al <sup>21</sup>                                                             |
| <i>CIITA</i>   | Loss of function | -                                                                      | Mottok et al <sup>23</sup> , Wang et al <sup>9</sup>                                                              |
| <i>CREBBP</i>  | Loss of function | -                                                                      | Bonzheim et al <sup>16</sup> , Wang et al <sup>9</sup>                                                            |
| <i>CSMD1</i>   | Loss of function | -                                                                      | Escudero-Esparza et al <sup>24</sup> , Lee et al <sup>15</sup>                                                    |
| <i>CXCR4</i>   | Gain of function | Nonsense in C-terminal hotspot (e.g. S342*)                            | Treon et al <sup>25</sup> , Lee et al <sup>15</sup>                                                               |
| <i>DTX1</i>    | Loss of function | -                                                                      | de Miranda et al <sup>26</sup> , Lee et al <sup>15</sup>                                                          |
| <i>DUSP2</i>   | N.I.             | -                                                                      | Lee et al <sup>15</sup> , Wang et al <sup>9</sup>                                                                 |
| <i>EHD1</i>    | N.I.             | -                                                                      | Lee et al <sup>15</sup>                                                                                           |
| <i>EP300</i>   | Loss of function | -                                                                      | Schmitz et al <sup>11</sup>                                                                                       |
| <i>ERBB4</i>   | Gain of function | -                                                                      | Wang et al <sup>9</sup>                                                                                           |
| <i>ETS1</i>    | Loss of function | -                                                                      | Morin et al <sup>13</sup> , Bonetti et al <sup>27</sup> , Wang et al <sup>9</sup>                                 |
| <i>ETV6</i>    | Loss of function | -                                                                      | Bonzheim et al <sup>16</sup> , Wang et al <sup>9</sup>                                                            |
| <i>EZH2</i>    | Gain of function | -                                                                      | Zhang et al <sup>10</sup> , Schmitz et al <sup>11</sup>                                                           |
| <i>FAS</i>     | Loss of function | -                                                                      | Grønbaek et al <sup>28</sup> , Schmitz et al <sup>11</sup>                                                        |
| <i>FAT1</i>    | Loss of function | -                                                                      | Laginestra et al <sup>29</sup> , Wang et al <sup>9</sup>                                                          |
| <i>FAT4</i>    | Loss of function | -                                                                      | Cai et al <sup>30</sup> , Lee et al <sup>15</sup>                                                                 |
| <i>FBXW7</i>   | Loss of function | -                                                                      | Wang et al <sup>9</sup>                                                                                           |

|                 |                  |                                                                 |                                                                                                                   |
|-----------------|------------------|-----------------------------------------------------------------|-------------------------------------------------------------------------------------------------------------------|
| <i>FLT3</i>     | Gain of function | Missense in thymidine kinase domain (e.g. D835)                 | Wang et al <sup>9</sup>                                                                                           |
| <i>FLT4</i>     | Gain of function | Missense in thymidine kinase domain                             | Liu et al <sup>31</sup> , Wang et al <sup>9</sup>                                                                 |
| <i>FOXO1</i>    | Loss of function | Missense in phosphoinositide 3-kinase/AKT phosphorylation sites | Trinh et al <sup>32</sup> , Wang et al <sup>9</sup>                                                               |
| <i>FRY</i>      | Loss of function | -                                                               | Lee et al <sup>15</sup> , Mai et al <sup>33</sup>                                                                 |
| <i>GADD45B</i>  | N.I.             | -                                                               | Wang et al <sup>9</sup>                                                                                           |
| <i>GNA13</i>    | Loss of function | -                                                               | Muppidi et al <sup>34</sup> , Schmitz et al <sup>11</sup>                                                         |
| <i>GRHR</i>     | Loss of function | -                                                               | Lee et al <sup>15</sup> , Andrades et al <sup>35</sup>                                                            |
| <i>HIST1H1B</i> | Loss of function | -                                                               | Li et al <sup>36</sup> , Lee et al <sup>15</sup>                                                                  |
| <i>HIST1H1C</i> | Loss of function | -                                                               | Li et al <sup>36</sup> , Lee et al <sup>15</sup>                                                                  |
| <i>HIST1H1E</i> | Loss of function | -                                                               | Li et al <sup>36</sup> , Lee et al <sup>15</sup>                                                                  |
| <i>HIST1H4H</i> | Loss of function | -                                                               | Li et al <sup>36</sup> , Lee et al <sup>15</sup>                                                                  |
| <i>IGLL5</i>    | Loss of function | -                                                               | Bonzheim et al <sup>16</sup> , Lee et al <sup>15</sup>                                                            |
| <i>IKZF3</i>    | Loss of function | -                                                               | Wang et al <sup>9</sup>                                                                                           |
| <i>IRF4</i>     | Loss of function | Missense in DNA binding domain                                  | Cherian et al <sup>37</sup> , Lee et al <sup>15</sup> ,<br>Bonzheim et al <sup>16</sup> , Wang et al <sup>9</sup> |
| <i>IRF8</i>     | Loss of function | Missense in DNA binding domain                                  | Reddy et al <sup>38</sup> , Lee et al <sup>15</sup>                                                               |
| <i>ITPKB</i>    | Loss of function | -                                                               | Schmitz et al <sup>11</sup>                                                                                       |
| <i>KLHL14</i>   | Loss of function | -                                                               | Choi et al <sup>39</sup> , Lee et al <sup>15</sup>                                                                |
| <i>KLHL6</i>    | Loss of function | -                                                               | Schmitz et al <sup>11</sup>                                                                                       |
| <i>KMT2D</i>    | Loss of function | -                                                               | Lee et al <sup>15</sup> , Wang et al <sup>9</sup>                                                                 |
| <i>LRP1B</i>    | Loss of function | -                                                               | Lee et al <sup>15</sup>                                                                                           |
| <i>LRIG1</i>    | N.I.             | -                                                               | Lee et al <sup>15</sup>                                                                                           |
| <i>MCL1</i>     | N.I.             | -                                                               | Wang et al <sup>9</sup>                                                                                           |
| <i>MED12</i>    | N.I.             | -                                                               | Wang et al <sup>38</sup>                                                                                          |
| <i>MEF2B</i>    | N.I.             | -                                                               | Pon et al <sup>40</sup> , Wang et al <sup>9</sup>                                                                 |
| <i>MALT1</i>    | N.I.             | -                                                               | Schmitz et al <sup>11</sup>                                                                                       |
| <i>MPEG1</i>    | Loss of function | -                                                               | Schmitz et al <sup>11</sup> , Lee et al <sup>15</sup>                                                             |
| <i>MUC16</i>    | N.I.             | -                                                               | Lee et al <sup>15</sup>                                                                                           |
| <i>MTOR</i>     | Loss of function | -                                                               | Schmitz et al <sup>11</sup>                                                                                       |
| <i>MYC</i>      | Gain of function | -                                                               | Wang et al <sup>9</sup>                                                                                           |
| <i>MYD88</i>    | Gain of function | -                                                               | Lee et al <sup>15</sup> , Bonzheim et al <sup>16</sup> , Wang et al <sup>9</sup>                                  |
| <i>NFKB1</i>    | Loss of function | -                                                               | Wang et al <sup>9</sup>                                                                                           |
| <i>NF1</i>      | Loss of function | -                                                               | Schmitz et al <sup>11</sup>                                                                                       |
| <i>NFKBIA</i>   | Loss of function | -                                                               | Schmitz et al <sup>11</sup> , Weniger et al <sup>41</sup>                                                         |
| <i>NFKBIE</i>   | Loss of function | -                                                               | Schmitz et al <sup>11</sup> , Weniger et al <sup>41</sup>                                                         |
| <i>NFKBIZ</i>   | N.I.             | -                                                               | Schmitz et al <sup>11</sup>                                                                                       |
| <i>NOTCH1</i>   | Gain of function | -                                                               | Schmitz et al <sup>11</sup>                                                                                       |
| <i>NOTCH2</i>   | Gain of function | -                                                               | Schmitz et al <sup>11</sup>                                                                                       |
| <i>OSBPL10</i>  | N.I.             | -                                                               | Dobashi et al <sup>42</sup> , Lee et al <sup>15</sup>                                                             |
| <i>OTOF</i>     | N.I.             | -                                                               | Lee et al <sup>15</sup>                                                                                           |
| <i>PCDH15</i>   | N.I.             | -                                                               | Lee et al <sup>15</sup>                                                                                           |
| <i>PAX5</i>     | Loss of function | -                                                               | Schmitz et al <sup>11</sup> , Gu et al <sup>43</sup>                                                              |
| <i>PIM1</i>     | Loss of function | -                                                               | Lee et al <sup>15</sup> , Bonzheim et al <sup>16</sup> , Wang et al <sup>9</sup>                                  |
| <i>PLCG2</i>    | N.I.             | -                                                               | Wang et al <sup>9</sup>                                                                                           |
| <i>PRDM1</i>    | Loss of function | -                                                               | Bonzheim et al <sup>16</sup> , Wang et al <sup>9</sup>                                                            |
| <i>RBMX</i>     | Loss of function | -                                                               | Schmitz et al <sup>11</sup> , Zheng et al <sup>44</sup>                                                           |
| <i>PTEN</i>     | Loss of function | -                                                               | Schmitz et al <sup>11</sup>                                                                                       |
| <i>REL</i>      | N.I.             | -                                                               | Schmitz et al <sup>11</sup>                                                                                       |
| <i>RP1</i>      | N.I.             | -                                                               | Lee et al <sup>15</sup>                                                                                           |
| <i>RUNX1</i>    | Loss of function | -                                                               | Wang et al <sup>9</sup>                                                                                           |
| <i>SETBP1</i>   | Gain of function | -                                                               | Wang et al <sup>9</sup>                                                                                           |

|                 |                  |                                               |                                                                                            |
|-----------------|------------------|-----------------------------------------------|--------------------------------------------------------------------------------------------|
| <i>RHOA</i>     | Gain of function | -                                             | Schmitz et al <sup>11</sup>                                                                |
| <i>SGK1</i>     | Gain of function | -                                             | Schmitz et al <sup>11</sup>                                                                |
| <i>SOCS1</i>    | Loss of function | -                                             | Schmitz et al <sup>11</sup>                                                                |
| <i>SPEN</i>     | Loss of function | -                                             | Reddy et al <sup>40</sup> , Schmitz et al <sup>11</sup>                                    |
| <i>STAT3</i>    | Gain of function | Missense in SH2 domain<br>(e.g. Y640F, D661Y) | Koskela et al <sup>45</sup> , Schmitz et al <sup>11</sup>                                  |
| <i>STAT6</i>    | Gain of function | Missense in DNA binding domain<br>(e.g. D419) | Yildiz et al <sup>46</sup> , Schmitz et al <sup>11</sup>                                   |
| <i>TBL1XR1</i>  | Loss of function | Missense in WD domain                         | Venturutti et al <sup>47</sup> , Bonzheim et al <sup>16</sup> ,<br>Wang et al <sup>9</sup> |
| <i>TCF3</i>     | Gain of function | -                                             | Schmitz et al <sup>11</sup>                                                                |
| <i>TET2</i>     | Loss of function | -                                             | Schmitz et al <sup>11</sup>                                                                |
| <i>TMSB4X</i>   | N.I.             | -                                             | Lee et al <sup>15</sup>                                                                    |
| <i>TNFAIP3</i>  | Loss of function | -                                             | Kato et al <sup>48</sup> , Schmitz et al <sup>11</sup>                                     |
| <i>TNFRSF14</i> | Loss of function | -                                             | Schmitz et al <sup>11</sup> , Wu et al <sup>49</sup>                                       |
| <i>TP53</i>     | Loss of function | -                                             | Schmitz et al <sup>11</sup> , Wang et al <sup>9</sup>                                      |
| <i>UBALD2</i>   | N.I.             | -                                             | Lee et al <sup>15</sup>                                                                    |
| <i>USH2A</i>    | N.I.             | -                                             | Lee et al <sup>15</sup>                                                                    |
| <i>ZFP36L1</i>  | Loss of function | -                                             | Reddy et al <sup>38</sup> , Lee et al <sup>15</sup>                                        |

N.I., Not identified. Details of references were listed in supplementary references.

**Table S2.** Detected pathogenic genetic mutations

| Case | Gene           | Mutation type | cDNA change                                           | AA change           | VAF (%) | Read depth |
|------|----------------|---------------|-------------------------------------------------------|---------------------|---------|------------|
| 1    | <i>MYD88</i>   | Missense      | c.794T>C                                              | p.Leu265Pro         | 29.36   | 453        |
| 1    | <i>PIMI</i>    | Frameshift    | c.644_680delAGCCGGTGCAAGATCTCTTC<br>GACTTCATCACGGAAAG | p.Glu215GlyfsTer138 | 20.99   | 567        |
| 1    | <i>PIMI</i>    | Nonsense      | c.691C>T                                              | p.Gln231Ter         | 40.71   | 565        |
| 1    | <i>ETS1</i>    | Nonsense      | c.1323C>G                                             | p.Tyr441Ter         | 27.11   | 439        |
| 1    | <i>CD79B</i>   | Missense      | c.590A>G                                              | p.Tyr197Cys         | 27.89   | 882        |
| 1    | <i>BTG2</i>    | Missense      | c.133G>T                                              | p.Ala45Ser          | 14.31   | 1,139      |
| 10   | <i>TBL1XR1</i> | Missense      | c.1108G>T                                             | p.Asp370Tyr         | 55.50   | 582        |
| 10   | <i>PIMI</i>    | Splice        | c.513+1G>C                                            |                     | 57.03   | 619        |
| 10   | <i>PRDM1</i>   | Splice        | c.291G>C                                              | p.Glu97Asp          | 58.21   | 1,029      |
| 10   | <i>PRDM1</i>   | Splice        | c.291+1G>A                                            |                     | 58.41   | 1,029      |
| 10   | <i>CDKN2A</i>  | Missense      | c.247C>T                                              | p.His83Tyr          | 64.08   | 710        |
| 10   | <i>ETV6</i>    | Splice        | c.33+1G>A                                             |                     | 71.48   | 519        |
| 10   | <i>CD79B</i>   | Missense      | c.590A>G                                              | p.Tyr197Cys         | 78.99   | 2,385      |
| 10   | <i>KLHL14</i>  | Nonsense      | c.289C>T                                              | p.Gln97Ter          | 44.37   | 978        |
| 10   | <i>IGLL5</i>   | Nonsense      | c.64C>T                                               | p.Gln22Ter          | 42.40   | 500        |
| 10   | <i>BTG2</i>    | Missense      | c.142G>A                                              | p.Glu48Lys          | 43.54   | 2,522      |
| 10   | <i>BTG2</i>    | Missense      | c.157C>T                                              | p.His53Tyr          | 35.65   | 3,669      |
| 10   | <i>BTG1</i>    | Missense      | c.498G>A                                              | p.Met166Ile         | 39.23   | 1,300      |
| 10   | <i>BTG1</i>    | Missense      | c.398G>A                                              | p.Ser133Asn         | 44.41   | 1,504      |
| 10   | <i>BTG1</i>    | Missense      | c.208A>G                                              | p.Ile70Val          | 40.31   | 2,079      |
| 10   | <i>BTG1</i>    | Missense      | c.129C>A                                              | p.Ser43Arg          | 46.29   | 283        |
| 12   | <i>MYD88</i>   | Missense      | c.794T>C                                              | p.Leu265Pro         | 28.17   | 1,260      |
| 12   | <i>PIMI</i>    | Frameshift    | c.149_156delGCAACGCC                                  | p.Arg50HisfsTer13   | 56.27   | 670        |
| 12   | <i>PIMI</i>    | Frameshift    | c.276delG                                             | p.Met92IlefsTer93   | 60.48   | 625        |
| 12   | <i>PIMI</i>    | Nonsense      | c.676G>T                                              | p.Glu226Ter         | 48.71   | 1,944      |
| 12   | <i>PIMI</i>    | Nonsense      | c.720_748delGCAGGTGCTGGAGGCCCGTGC<br>GGCACTGCC        | p.Trp240Ter         | 24.73   | 1,326      |
| 12   | <i>PRDM1</i>   | Frameshift    | c.500_522delCTCCCCGGGAGCAAAACCTG<br>GCT               | p.Ser167CysfsTer14  | 34.95   | 495        |
| 12   | <i>ACTB</i>    | Missense      | c.143G>A                                              | p.Gly48Asp          | 26.49   | 1,797      |
| 12   | <i>ETV6</i>    | Nonsense      | c.19C>T                                               | p.Gln7Ter           | 30.12   | 601        |
| 12   | <i>ETV6</i>    | Missense      | c.1172A>G                                             | p.Tyr391Cys         | 23.27   | 709        |
| 12   | <i>BTG1</i>    | Nonsense      | c.103C>T                                              | p.Arg35Ter          | 37.11   | 256        |



|    |                 |            |                                              |                     |       |       |
|----|-----------------|------------|----------------------------------------------|---------------------|-------|-------|
| 12 | <i>KLHL14</i>   | Frameshift | c.625_635delCTGGTGGAGGA                      | p.Leu209CysfsTer47  | 34.28 | 878   |
| 12 | <i>KLHL14</i>   | Nonsense   | c.271C>T                                     | p.Gln91Ter          | 29.34 | 634   |
| 12 | <i>IGLL5</i>    | Splice     | c.206+2T>A                                   |                     | 24.32 | 6,187 |
| 12 | <i>BTG2</i>     | Missense   | c.83G>A                                      | p.Gly28Asp          | 26.39 | 2,876 |
| 12 | <i>BTG2</i>     | Missense   | c.185G>C                                     | p.Gly62Ala          | 25.24 | 2,524 |
| 12 | <i>BTG1</i>     | Missense   | c.304C>T                                     | p.Leu102Phe         | 31.11 | 270   |
| 12 | <i>BTG1</i>     | Missense   | c.116C>T                                     | p.Thr39Ile          | 36.33 | 256   |
| 22 | <i>MYD88</i>    | Missense   | c.794T>C                                     | p.Leu265Pro         | 31.92 | 639   |
| 22 | <i>TBLIXR1</i>  | Missense   | c.941T>A                                     | p.Val314Asp         | 37.48 | 643   |
| 22 | <i>HIST1H1B</i> | Missense   | c.392C>G                                     | p.Ala131Gly         | 73.16 | 395   |
| 22 | <i>PIMI</i>     | Nonsense   | c.652C>T                                     | p.Gln218Ter         | 48.17 | 546   |
| 22 | <i>PRDM1</i>    | Splice     | c.291G>C                                     | p.Glu97Asp          | 74.72 | 542   |
| 22 | <i>CDKN2A</i>   | Missense   | c.197A>G                                     | p.His66Arg          | 85.45 | 55    |
| 22 | <i>PTEN</i>     | Frameshift | c.149_153dupTTGAT                            | p.Asp52LeufsTer4    | 27.35 | 1,104 |
| 22 | <i>MPEG1</i>    | Nonsense   | c.271C>T                                     | p.Gln91Ter          | 33.27 | 505   |
| 22 | <i>KMT2D</i>    | Nonsense   | c.6229C>T                                    | p.Gln2077Ter        | 38.25 | 1,336 |
| 22 | <i>CIITA</i>    | Nonsense   | c.657C>A                                     | p.Cys219Ter         | 36.02 | 1,180 |
| 22 | <i>CD79B</i>    | Missense   | c.590A>C                                     | p.Tyr197Ser         | 34.73 | 976   |
| 26 | <i>BTG2</i>     | Nonsense   | c.16G>T                                      | p.Gly6Ter           | 47.99 | 2,761 |
| 26 | <i>MYD88</i>    | Missense   | c.794T>C                                     | p.Leu265Pro         | 39.86 | 1,041 |
| 26 | <i>TBLIXR1</i>  | Missense   | c.1099T>C                                    | p.Cys367Arg         | 38.34 | 866   |
| 26 | <i>HIST1H1B</i> | Frameshift | c.230_257delAGAAGAATAACAGCCGCATT<br>AAGCTGGG | p.Glu77AlafsTer6    | 18.61 | 1,752 |
| 26 | <i>PIMI</i>     | Nonsense   | c.387C>G                                     | p.Tyr129Ter         | 51.70 | 853   |
| 26 | <i>PAX5</i>     | Splice     | c.41_46+13delGGACAGGTAGGACCGCGAT             |                     | 35.36 | 1,151 |
| 26 | <i>GRHPR</i>    | Frameshift | c.129_130delGG                               | p.Glu44AlafsTer48   | 15.02 | 486   |
| 26 | <i>GRHPR</i>    | Frameshift | c.129_130delGG                               | p.Glu44AlafsTer48   | 15.02 | 486   |
| 26 | <i>GRHPR</i>    | Frameshift | c.129_130delGG                               | p.Glu44AlafsTer48   | 15.02 | 486   |
| 26 | <i>MPEG1</i>    | Nonsense   | c.1201G>T                                    | p.Glu401Ter         | 29.63 | 1,441 |
| 26 | <i>MPEG1</i>    | Frameshift | c.1195_1196delAA                             | p.Lys399ValfsTer10  | 36.38 | 1,443 |
| 26 | <i>MPEG1</i>    | Frameshift | c.920delG                                    | p.Gly307AlafsTer21  | 29.60 | 1,108 |
| 26 | <i>ETV6</i>     | Splice     | c.33+1G>C                                    |                     | 57.42 | 404   |
| 26 | <i>ETV6</i>     | Nonsense   | c.427C>T                                     | p.Gln143Ter         | 54.02 | 1,405 |
| 26 | <i>KMT2D</i>    | Nonsense   | c.14152G>T                                   | p.Glu4718Ter        | 43.40 | 1,719 |
| 26 | <i>CIITA</i>    | Nonsense   | c.1099C>T                                    | p.Gln367Ter         | 30.15 | 617   |
| 26 | <i>CIITA</i>    | Frameshift | c.3052delG                                   | p.Glu1018LysfsTer32 | 62.17 | 423   |

|    |                |            |                            |                     |       |       |
|----|----------------|------------|----------------------------|---------------------|-------|-------|
| 26 | <i>BCL2</i>    | Missense   | c.351C>G                   | p.Ser117Arg         | 24.56 | 2,895 |
| 26 | <i>BCL2</i>    | Missense   | c.20C>T                    | p.Thr71Ile          | 27.50 | 1,491 |
| 26 | <i>GRHPR</i>   | Frameshift | c.129_130delGG             | p.Glu44AlafsTer48   | 15.02 | 486   |
| 26 | <i>GRHPR</i>   | Frameshift | c.129_130delGG             | p.Glu44AlafsTer48   | 15.02 | 486   |
| 26 | <i>BTG2</i>    | Missense   | c.96G>T                    | p.Glu32Asp          | 26.12 | 2,726 |
| 31 | <i>MYD88</i>   | Missense   | c.794T>C                   | p.Leu265Pro         | 34.50 | 774   |
| 31 | <i>TBLIXR1</i> | Missense   | c.1051G>A                  | p.Glu351Lys         | 32.16 | 398   |
| 31 | <i>TET2</i>    | Frameshift | c.4745_4746delCT           | p.Ser1582PhefsTer31 | 12.00 | 175   |
| 31 | <i>PIMI</i>    | Frameshift | c.201_214delGCACAGCCCCGGCT | p.His68ArgfsTer101  | 73.88 | 157   |
| 31 | <i>PIMI</i>    | Splice     | c.513+1G>A                 |                     | 30.50 | 400   |
| 31 | <i>PIMI</i>    | Nonsense   | c.652C>T                   | p.Gln218Ter         | 56.61 | 295   |
| 31 | <i>PIMI</i>    | Nonsense   | c.691C>T                   | p.Gln231Ter         | 33.74 | 492   |
| 31 | <i>PIMI</i>    | Frameshift | c.711_724delCTTCTTCTGGCAGG | p.Phe238AlafsTer57  | 38.14 | 527   |
| 31 | <i>PIMI</i>    | Nonsense   | c.1057G>T                  | p.Glu353Ter         | 24.67 | 608   |
| 31 | <i>ETV6</i>    | Splice     | c.34-1G>A                  |                     | 29.54 | 799   |
| 31 | <i>ETV6</i>    | Splice     | c.1254-2A>G                |                     | 31.91 | 564   |
| 31 | <i>KMT2D</i>   | Nonsense   | c.11911C>T                 | p.Gln3971Ter        | 33.17 | 612   |
| 31 | <i>DTX1</i>    | Nonsense   | c.229C>T                   | p.Gln77Ter          | 32.22 | 239   |
| 31 | <i>CD79B</i>   | Missense   | c.589T>C                   | p.Tyr197His         | 69.73 | 621   |
| 31 | <i>BTG1</i>    | Missense   | c.347G>A                   | p.Gly116Glu         | 41.59 | 428   |
| 31 | <i>BTG1</i>    | Missense   | c.145G>A                   | p.Ala49Thr          | 36.11 | 144   |
| 39 | <i>MYD88</i>   | Missense   | c.794T>C                   | p.Leu265Pro         | 39.48 | 423   |
| 39 | <i>KMT2D</i>   | Nonsense   | c.12844C>T                 | p.Arg4282Ter        | 34.29 | 35    |
| 49 | <i>MYD88</i>   | Missense   | c.794T>C                   | p.Leu265Pro         | 46.60 | 515   |
| 49 | <i>PIMI</i>    | Nonsense   | c.697G>T                   | p.Glu233Ter         | 73.22 | 956   |
| 49 | <i>PIMI</i>    | Frameshift | c.737_740delTGCG           | p.Val246GlyfsTer118 | 73.17 | 954   |
| 49 | <i>CD79B</i>   | Missense   | c.590A>C                   | p.Tyr197Ser         | 48.21 | 1,931 |
| 49 | <i>KLHL14</i>  | Nonsense   | c.763C>T                   | p.Gln255Ter         | 47.42 | 1,242 |
| 49 | <i>KLHL14</i>  | Nonsense   | c.735G>A                   | p.Trp245Ter         | 42.69 | 1,225 |
| 49 | <i>BTG1</i>    | Missense   | c.123C>G                   | p.Ser41Arg          | 42.96 | 135   |
| 49 | <i>BTG1</i>    | Missense   | c.108G>C                   | p.Gln36His          | 42.96 | 135   |
| 52 | <i>PIMI</i>    | Nonsense   | c.927C>G                   | p.Tyr309Ter         | 33.15 | 374   |
| 52 | <i>PRDM1</i>   | Nonsense   | c.232C>T                   | p.Gln78Ter          | 50.64 | 543   |
| 52 | <i>ACTB</i>    | Missense   | c.217C>T                   | p.His73Tyr          | 68.18 | 396   |
| 52 | <i>CSMD1</i>   | Nonsense   | c.9254G>A                  | p.Trp3085Ter        | 30.49 | 505   |
| 52 | <i>ETV6</i>    | Missense   | c.1256T>G                  | p.Phe419Cys         | 33.62 | 687   |
| 52 | <i>BCL7A</i>   | Missense   | c.91T>C                    | p.Trp31Arg          | 32.85 | 137   |

|    |               |            |                                           |                    |       |       |
|----|---------------|------------|-------------------------------------------|--------------------|-------|-------|
| 52 | <i>CREBBP</i> | Missense   | c.4463C>T                                 | p.Pro1488Leu       | 48.61 | 1,473 |
| 52 | <i>CD79B</i>  | Missense   | c.590A>G                                  | p.Tyr197Cys        | 58.42 | 1,152 |
| 52 | <i>MYD88</i>  | Missense   | c.794T>C                                  | p.Leu265Pro        | 63.94 | 391   |
| 52 | <i>BTG2</i>   | Missense   | c.273G>C                                  | p.Gln91His         | 42.53 | 783   |
| 56 | <i>PIMI</i>   | Nonsense   | c.382C>T                                  | p.Gln128Ter        | 55.11 | 303   |
| 56 | <i>ACTB</i>   | Missense   | c.137G>C                                  | p.Gly46Ala         | 33.64 | 431   |
| 56 | <i>CD79B</i>  | Missense   | c.590A>C                                  | p.Tyr197Ser        | 34.32 | 1,110 |
| 56 | <i>MYD88</i>  | Missense   | c.794T>C                                  | p.Leu265Pro        | 43.04 | 381   |
| 56 | <i>BTG1</i>   | Nonsense   | c.168G>A                                  | p.Trp56Ter         | 57.03 | 626   |
| 56 | <i>BTG1</i>   | Missense   | c.400A>T                                  | p.Thr134Ser        | 50.12 | 431   |
| 56 | <i>BTG1</i>   | Missense   | c.160C>T                                  | p.His54Tyr         | 57.03 | 626   |
| 56 | <i>BTG1</i>   | Missense   | c.8C>T                                    | p.Pro3Leu          | 26.63 | 612   |
| 61 | <i>PIMI</i>   | Nonsense   | c.387C>A                                  | p.Tyr129Ter        | 48.55 | 1,584 |
| 61 | <i>PIMI</i>   | Splice     | c.513+1G>A                                |                    | 38.99 | 418   |
| 61 | <i>KMT2D</i>  | Splice     | c.10441-2A>G                              |                    | 66.88 | 2,962 |
| 61 | <i>IKZF3</i>  | Splice     | c.826+1G>T                                |                    | 52.79 | 1,847 |
| 61 | <i>BTG2</i>   | Frameshift | c.100_124delAGGCTTAAGGTCTTCAGCGG<br>GGCGC | p.Arg34SerfsTer59  | 41.52 | 2,271 |
| 61 | <i>MYD88</i>  | Missense   | c.794T>C                                  | p.Leu265Pro        | 94.93 | 592   |
| 61 | <i>BTG1</i>   | Missense   | c.14A>T                                   | p.Tyr5Phe          | 20.82 | 1,047 |
| 82 | <i>SOCS1</i>  | Frameshift | c.312_330delCGACAGCCGCCAGCGGAAC           | p.Asp105AlafsTer7  | 23.05 | 564   |
| 87 | <i>LRP1B</i>  | Splice     | c.1971-2A>T                               |                    | 47.28 | 1,303 |
| 87 | <i>TBLXR1</i> | Missense   | c.920A>G                                  | p.His307Arg        | 50.79 | 1,262 |
| 87 | <i>BCL7A</i>  | Splice     | c.92+1G>A                                 |                    | 41.35 | 237   |
| 87 | <i>CREBBP</i> | Nonsense   | c.5701C>T                                 | p.Gln1901Ter       | 50.00 | 92    |
| 87 | <i>NF1</i>    | Nonsense   | c.669G>A                                  | p.Trp223Ter        | 45.19 | 135   |
| 87 | <i>BTG2</i>   | Missense   | c.52G>A                                   | p.Gly18Ser         | 53.98 | 2,321 |
| 87 | <i>BTG2</i>   | Missense   | c.83G>A                                   | p.Gly28Asp         | 53.83 | 2,326 |
| 87 | <i>BTG2</i>   | Missense   | c.133G>T                                  | p.Ala45Ser         | 53.64 | 2,321 |
| 87 | <i>BTG2</i>   | Missense   | c.136C>T                                  | p.Leu46Phe         | 40.55 | 2,328 |
| 97 | <i>PIMI</i>   | Nonsense   | c.652C>T                                  | p.Gln218Ter        | 80.38 | 581   |
| 97 | <i>PIMI</i>   | Nonsense   | c.720G>A                                  | p.Trp240Ter        | 41.68 | 715   |
| 97 | <i>PIMI</i>   | Nonsense   | c.908G>A                                  | p.Trp303Ter        | 41.99 | 443   |
| 97 | <i>PRDM1</i>  | Splice     | c.291G>C                                  | p.Glu97Asp         | 51.92 | 728   |
| 97 | <i>GRHPR</i>  | Splice     | c.214+1G>A                                |                    | 41.75 | 103   |
| 97 | <i>GRHPR</i>  | Splice     | c.287+1G>A                                |                    | 36.71 | 779   |
| 97 | <i>KMT2D</i>  | Frameshift | c.15891_15895dupGGTGC                     | p.His5299ArgfsTer8 | 37.80 | 463   |

|     |                 |            |                                                                 |                    |       |       |
|-----|-----------------|------------|-----------------------------------------------------------------|--------------------|-------|-------|
| 97  | <i>CD79B</i>    | Missense   | c.590A>G                                                        | p.Tyr197Cys        | 33.35 | 1,475 |
| 97  | <i>BTG2</i>     | Splice     | c.142+1G>C                                                      |                    | 30.43 | 1,620 |
| 97  | <i>MYD88</i>    | Missense   | c.794T>C                                                        | p.Leu265Pro        | 33.06 | 605   |
| 97  | <i>MPEG1</i>    | Nonsense   | c.556C>T                                                        | p.Gln186Ter        | 29.55 | 714   |
| 114 | <i>FBXW7</i>    | Missense   | c.1513C>T                                                       | p.Arg505Cys        | 47.07 | 2,422 |
| 114 | <i>IRF4</i>     | Missense   | c.208C>G                                                        | p.Leu70Val         | 26.67 | 30    |
| 114 | <i>PIMI</i>     | Frameshift | c.245 249delGTCCC                                               | p.Arg82LeufsTer90  | 60.07 | 263   |
| 114 | <i>PIMI</i>     | Frameshift | c.674 702delCGGAAAGGGGAGCCCTGCAA<br>GAGGAGCTG                   | p.Thr225SerfsTer65 | 84.02 | 795   |
| 114 | <i>CSMD1</i>    | Splice     | c.9814+1G>A                                                     |                    | 44.04 | 965   |
| 114 | <i>ETV6</i>     | Splice     | c.12 33+24delTCCTGCTCAGTGTAGCATTA<br>AGGTAAAAATCTTCTCCCCTCCTTCT |                    | 50.84 | 356   |
| 114 | <i>BCL7A</i>    | Missense   | c.70G>A                                                         | p.Ala24Thr         | 46.23 | 106   |
| 114 | <i>KLHL14</i>   | Nonsense   | c.562C>T                                                        | p.Gln188Ter        | 33.91 | 929   |
| 114 | <i>KLHL14</i>   | Nonsense   | c.550C>T                                                        | p.Gln184Ter        | 42.80 | 736   |
| 114 | <i>MYD88</i>    | Missense   | c.794T>C                                                        | p.Leu265Pro        | 45.77 | 627   |
| 114 | <i>MEF2B</i>    | Frameshift | c.396 399dupTGCA                                                | p.Ala134CysfsTer21 | 46.81 | 94    |
| 114 | <i>BTG2</i>     | Missense   | c.83G>A                                                         | p.Gly28Asp         | 32.40 | 1,923 |
| 114 | <i>BTG2</i>     | Missense   | c.92G>A                                                         | p.Ser31Asn         | 32.40 | 1,923 |
| 126 | <i>FAT4</i>     | Nonsense   | c.3754G>T                                                       | p.Gly1252Ter       | 36.60 | 806   |
| 126 | <i>FRY</i>      | Frameshift | c.2667delT                                                      | p.Leu890TrpfsTer30 | 20.41 | 49    |
| 132 | <i>ITPKB</i>    | Nonsense   | c.691A>T                                                        | p.Lys231Ter        | 32.56 | 1,170 |
| 132 | <i>MYD88</i>    | Missense   | c.794T>C                                                        | p.Leu265Pro        | 54.79 | 1,608 |
| 132 | <i>TBL1XR1</i>  | Missense   | c.1184A>T                                                       | p.Tyr395Phe        | 44.29 | 736   |
| 132 | <i>ACTB</i>     | Missense   | c.193C>T                                                        | p.Leu65Phe         | 28.15 | 959   |
| 132 | <i>GRHPR</i>    | Splice     | c.214+1G>A                                                      |                    | 43.33 | 90    |
| 132 | <i>ETV6</i>     | Splice     | c.33+1G>A                                                       |                    | 54.30 | 151   |
| 132 | <i>IRF8</i>     | Missense   | c.197A>G                                                        | p.Lys66Arg         | 38.90 | 365   |
| 132 | <i>BTG2</i>     | Missense   | c.83G>A                                                         | p.Gly28Asp         | 29.77 | 2,267 |
| 136 | <i>MYD88</i>    | Missense   | c.794T>C                                                        | p.Leu265Pro        | 64.93 | 211   |
| 136 | <i>HIST1H1E</i> | Missense   | c.308G>A                                                        | p.Gly103Asp        | 22.31 | 130   |
| 136 | <i>IGLL5</i>    | Frameshift | c.32 41delAGACCCCTGA                                            | p.Glu11GlyfsTer95  | 33.33 | 75    |
| 136 | <i>RBMX</i>     | Frameshift | c.1dupA                                                         | p.Met1?            | 36.17 | 47    |
| 136 | <i>KMT2D</i>    | Nonsense   | c.2635G>T                                                       | p.Glu879Ter        | 38.58 | 127   |
| 136 | <i>BCL7A</i>    | Nonsense   | c.92G>A                                                         | p.Trp31Ter         | 28.57 | 77    |
| 137 | <i>CD58</i>     | Nonsense   | c.471C>G                                                        | p.Tyr157Ter        | 35.48 | 1,581 |
| 137 | <i>CD58</i>     | Nonsense   | c.454C>T                                                        | p.Arg152Ter        | 38.45 | 1,597 |

|     |                |            |                |                    |       |       |
|-----|----------------|------------|----------------|--------------------|-------|-------|
| 137 | <i>ITPKB</i>   | Nonsense   | c.622C>T       | p.Gln208Ter        | 30.72 | 345   |
| 137 | <i>MYD88</i>   | Missense   | c.794T>C       | p.Leu265Pro        | 36.47 | 987   |
| 137 | <i>TBL1XR1</i> | Missense   | c.1200T>A      | p.Ser400Arg        | 37.32 | 142   |
| 137 | <i>TBL1XR1</i> | Missense   | c.1124T>A      | p.Ile375Lys        | 40.46 | 131   |
| 137 | <i>TBL1XR1</i> | Missense   | c.1123A>G      | p.Ile375Val        | 40.46 | 131   |
| 137 | <i>PIMI</i>    | Nonsense   | c.481G>T       | p.Glu161Ter        | 38.11 | 677   |
| 137 | <i>CDKN2A</i>  | Nonsense   | c.330G>A       | p.Trp110Ter        | 36.89 | 862   |
| 137 | <i>BCL7A</i>   | Missense   | c.86G>A        | p.Arg29His         | 31.16 | 276   |
| 137 | <i>CIITA</i>   | Frameshift | c.3021delC     | p.Ser1008GlnfsTer7 | 39.45 | 512   |
| 137 | <i>CD79B</i>   | Missense   | c.589T>G       | p.Tyr197Asp        | 34.08 | 1,247 |
| 137 | <i>GNA13</i>   | Nonsense   | c.79C>T        | p.Gln27Ter         | 27.96 | 651   |
| 139 | <i>MYD88</i>   | Missense   | c.794T>C       | p.Leu265Pro        | 54.98 | 1,346 |
| 139 | <i>PIMI</i>    | Nonsense   | c.361G>T       | p.Glu121Ter        | 39.10 | 693   |
| 139 | <i>PRDM1</i>   | Frameshift | c.485_486delTG | p.Val162GlufsTer26 | 81.73 | 197   |
| 139 | <i>ETV6</i>    | Splice     | c.33+1G>C      |                    | 83.65 | 159   |
| 139 | <i>CREBBP</i>  | Missense   | c.4472A>C      | p.Gln1491Pro       | 43.25 | 1,519 |
| 139 | <i>TP53</i>    | Missense   | c.761T>A       | p.Ile254Asn        | 82.95 | 733   |
| 139 | <i>CD79B</i>   | Missense   | c.589T>G       | p.Tyr197Asp        | 45.48 | 1,172 |
| 139 | <i>IGLL5</i>   | Frameshift | c.93_94delGG   | p.Ala32HisfsTer59  | 91.19 | 590   |
| 139 | <i>BTG1</i>    | Missense   | c.116C>T       | p.Thr39Ile         | 46.44 | 239   |
| 144 | <i>MYD88</i>   | Missense   | c.794T>C       | p.Leu265Pro        | 34.62 | 1,352 |
| 144 | <i>PRDM1</i>   | Splice     | c.291G>C       | p.Glu97Asp         | 53.34 | 718   |
| 144 | <i>CD79B</i>   | Missense   | c.590A>G       | p.Tyr197Cys        | 32.83 | 1,185 |
| 144 | <i>KLHL14</i>  | Nonsense   | c.289C>T       | p.Gln97Ter         | 38.02 | 313   |
| 144 | <i>BTG1</i>    | Missense   | c.17C>T        | p.Thr6Ile          | 33.89 | 773   |
| 147 | <i>GRHPR</i>   | Splice     | c.287+1G>A     |                    | 22.31 | 1,013 |
| 147 | <i>ETV6</i>    | Splice     | c.33+1delG     |                    | 20.29 | 138   |
| 147 | <i>IGLL5</i>   | Frameshift | c.212delT      | p.Leu71ArgfsTer38  | 31.77 | 1,432 |
| 147 | <i>MYD88</i>   | Missense   | c.794T>C       | p.Leu265Pro        | 31.90 | 1,279 |
| 147 | <i>MPEG1</i>   | Nonsense   | c.2131C>T      | p.Gln711Ter        | 17.74 | 248   |
| 173 | <i>CSMD1</i>   | Nonsense   | c.585G>A       | p.Trp195Ter        | 42.10 | 38    |
| 174 | <i>MYD88</i>   | Missense   | c.794T>C       | p.Leu265Pro        | 21.72 | 1,625 |
| 174 | <i>TBL1XR1</i> | Missense   | c.1100G>C      | p.Cys367Ser        | 23.48 | 1,001 |
| 174 | <i>PRDM1</i>   | Splice     | c.291G>A       | c.291G>A(p.=)      | 27.79 | 662   |
| 174 | <i>PRDM1</i>   | Splice     | c.291+1G>A     |                    | 27.79 | 662   |
| 174 | <i>CDKN2A</i>  | Nonsense   | c.329G>A       | p.Trp110Ter        | 49.78 | 1,137 |
| 174 | <i>KMT2D</i>   | Nonsense   | c.8050C>T      | p.Gln2684Ter       | 25.77 | 2,716 |

|     |                |            |                                        |                    |       |       |
|-----|----------------|------------|----------------------------------------|--------------------|-------|-------|
| 174 | <i>ZFP36L1</i> | Nonsense   | c.567C>A                               | p.Cys189Ter        | 27.47 | 1,791 |
| 174 | <i>KLHL14</i>  | Nonsense   | c.562C>T                               | p.Gln188Ter        | 35.16 | 2,076 |
| 179 | <i>NOTCH2</i>  | Nonsense   | c.7090C>T                              | p.Gln2364Ter       | 55.59 | 1,423 |
| 179 | <i>BTG2</i>    | Frameshift | c.115_116insACTTAAGGTCTTCA             | p.Ser39AsnfsTer67  | 29.44 | 1,155 |
| 179 | <i>BTG2</i>    | Frameshift | c.115_116insATTTAAGGTCTTCA             | p.Ser39AsnfsTer67  | 20.61 | 1,155 |
| 179 | <i>CD79B</i>   | Missense   | c.590A>C                               | p.Tyr197Ser        | 94.96 | 873   |
| 179 | <i>GNAI3</i>   | Nonsense   | c.111C>A                               | p.Cys37Ter         | 42.96 | 568   |
| 179 | <i>BTG2</i>    | Missense   | c.83G>A                                | p.Gly28Asp         | 40.72 | 1,159 |
| 179 | <i>BTG2</i>    | Missense   | c.121G>C                               | p.Ala41Pro         | 40.40 | 1,161 |
| 180 | <i>MYD88</i>   | Missense   | c.794T>C                               | p.Leu265Pro        | 42.18 | 211   |
| 180 | <i>IRF4</i>    | Nonsense   | c.178C>T                               | p.Gln60Ter         | 34.41 | 186   |
| 180 | <i>IRF4</i>    | Missense   | c.208C>G                               | p.Leu70Val         | 94.69 | 113   |
| 180 | <i>CD79B</i>   | Missense   | c.589T>G                               | p.Tyr197Asp        | 59.78 | 184   |
| 180 | <i>KMT2D</i>   | Nonsense   | c.12253C>T                             | p.Gln4085Ter       | 42.86 | 252   |
| 180 | <i>PIMI</i>    | Splice     | c.355+1G>C                             |                    | 96.80 | 437   |
| 180 | <i>ETV6</i>    | Splice     | c.33+1G>C                              |                    | 54.95 | 202   |
| 180 | <i>ETV6</i>    | Splice     | c.33+1delG                             |                    | 37.62 | 202   |
| 182 | <i>GNAI3</i>   | Splice     | c.283+1G>A                             |                    | 25.63 | 355   |
| 184 | <i>MYD88</i>   | Missense   | c.794T>C                               | p.Leu265Pro        | 38.05 | 1,201 |
| 184 | <i>TBLIXR1</i> | Missense   | c.971C>T                               | p.Ser324Phe        | 78.37 | 1,946 |
| 184 | <i>PIMI</i>    | Splice     | c.355+1G>A                             |                    | 39.38 | 678   |
| 184 | <i>PIMI</i>    | Nonsense   | c.432C>A                               | p.Tyr144Ter        | 66.80 | 253   |
| 184 | <i>PIMI</i>    | Frameshift | c.704_711delCCCGCAGC                   | p.Ala235ValfsTer62 | 23.55 | 1,622 |
| 184 | <i>GRHPR</i>   | Splice     | c.215-9_217delGCACAACAGGGG             |                    | 44.26 | 1,803 |
| 184 | <i>GRHPR</i>   | Frameshift | c.220_221delAA                         | p.Asn74SerfsTer18  | 44.36 | 1,799 |
| 184 | <i>MPEG1</i>   | Nonsense   | c.1687C>T                              | p.Gln563Ter        | 39.23 | 989   |
| 184 | <i>ETV6</i>    | Splice     | c.31_33+8delAAGGTAAAAAT                |                    | 80.45 | 133   |
| 184 | <i>ZFP36L1</i> | Frameshift | c.750delG                              | p.Glu250AspfsTer52 | 29.03 | 31    |
| 184 | <i>IGLL5</i>   | Frameshift | c.158_179delGAGCCTCAGTTGGAAGCAGC<br>CG | p.Gly53AspfsTer49  | 62.22 | 532   |
| 184 | <i>BTG2</i>    | Missense   | c.20C>T                                | p.Thr7Ile          | 59.84 | 1,367 |
| 184 | <i>BTG2</i>    | Missense   | c.277C>T                               | p.His93Tyr         | 37.53 | 1,327 |
| 184 | <i>BTG1</i>    | Missense   | c.197G>A                               | p.Gly66Asp         | 43.70 | 540   |
| 184 | <i>BTG1</i>    | Missense   | c.108G>C                               | p.Gln36His         | 39.51 | 205   |
| 184 | <i>BTG1</i>    | Missense   | c.91C>T                                | p.Leu31Phe         | 40.10 | 207   |

|     |                 |            |                                             |                   |       |       |
|-----|-----------------|------------|---------------------------------------------|-------------------|-------|-------|
| 189 | <i>MYD88</i>    | Missense   | c.794T>C                                    | p.Leu265Pro       | 88.47 | 1,102 |
| 189 | <i>CD79A</i>    | Nonsense   | c.553G>T                                    | p.Glu185Ter       | 52.75 | 728   |
| 189 | <i>IGLL5</i>    | Splice     | c.206+1G>T                                  |                   | 35.00 | 3,177 |
| 197 | <i>FBXW7</i>    | Missense   | c.1393C>T                                   | p.Arg465Cys       | 24.71 | 603   |
| 197 | <i>CD79B</i>    | Missense   | c.589T>A                                    | p.Tyr197Asn       | 28.35 | 1,252 |
| 197 | <i>EP300</i>    | Splice     | c.1529-2A>T                                 |                   | 33.33 | 222   |
| 204 | <i>HIST1H1C</i> | Frameshift | c.199_200delGC                              | p.Ala67CysfsTer5  | 40.15 | 259   |
| 204 | <i>IRF8</i>     | Missense   | c.67T>C                                     | p.Tyr23His        | 45.67 | 1,743 |
| 204 | <i>CD79B</i>    | Missense   | c.590A>C                                    | p.Tyr197Ser       | 38.41 | 2,114 |
| 204 | <i>GNAI3</i>    | Frameshift | c.93delC                                    | p.Lys32ArgfsTer14 | 39.48 | 1,145 |
| 204 | <i>GNAI3</i>    | Frameshift | c.80_89delAGCAACGCAA                        | p.Gln27ArgfsTer16 | 39.60 | 1,149 |
| 204 | <i>IGLL5</i>    | Splice     | c.206+17_206+18insTCAGGTAAGGGGCAA<br>GAGATT |                   | 49.00 | 1,945 |
| 204 | <i>MYD88</i>    | Missense   | c.794T>C                                    | p.Leu265Pro       | 46.65 | 701   |
| 204 | <i>BTG1</i>     | Missense   | c.206G>A                                    | p.Cys69Tyr        | 27.07 | 1,330 |

Abbreviations: AA, amino acid; VAF, variant allele frequency

Table S3. Detected pathogenic copy number alterations

| Case | Gene           | CNA  | Log <sub>2</sub> | Case | Gene           | CNA  | Log <sub>2</sub> | Case | Gene           | CNA  | Log <sub>2</sub> |
|------|----------------|------|------------------|------|----------------|------|------------------|------|----------------|------|------------------|
| 1    | <i>CDKN2A</i>  | Loss | -0.91            | 49   | <i>BCL2</i>    | Gain | 0.78             | 139  | <i>FLT3</i>    | Gain | 0.45             |
| 1    | <i>CDKN2B</i>  | Loss | -0.64            | 49   | <i>CD58</i>    | Loss | -0.28            | 139  | <i>PRDM1</i>   | Loss | -0.75            |
| 1    | <i>CSMD1</i>   | Loss | -0.51            | 49   | <i>CDKN2A</i>  | Loss | -3.17            | 139  | <i>SGK1</i>    | Loss | -0.89            |
| 1    | <i>IGLL5</i>   | Loss | -0.45            | 49   | <i>CDKN2B</i>  | Loss | -4.32            | 139  | <i>TNFAIP3</i> | Loss | -0.94            |
| 1    | <i>MYC</i>     | Gain | 0.53             | 49   | <i>CIITA</i>   | Loss | -0.74            | 139  | <i>TP53</i>    | Loss | -0.82            |
| 1    | <i>PRDM1</i>   | Loss | -0.37            | 49   | <i>ETV6</i>    | Loss | -0.95            | 144  | <i>CDKN2A</i>  | Loss | -1.12            |
| 1    | <i>SGK1</i>    | Loss | -0.47            | 49   | <i>IGLL5</i>   | Loss | -3.46            | 144  | <i>CDKN2B</i>  | Loss | -1.68            |
| 1    | <i>TNFAIP3</i> | Loss | -0.52            | 49   | <i>MALT1</i>   | Gain | 0.78             | 144  | <i>PRDM1</i>   | Loss | -0.53            |
| 10   | <i>BCL7A</i>   | Loss | -0.45            | 52   | <i>CDKN2A</i>  | Loss | -1.28            | 144  | <i>SGK1</i>    | Loss | -0.36            |
| 10   | <i>CDKN2A</i>  | Loss | -0.68            | 52   | <i>CDKN2B</i>  | Loss | -2.51            | 144  | <i>STAT6</i>   | Gain | 0.80             |
| 10   | <i>CDKN2B</i>  | Loss | -1.29            | 52   | <i>MEF2B</i>   | Loss | -0.61            | 144  | <i>TNFAIP3</i> | Loss | -0.55            |
| 10   | <i>ETV6</i>    | Loss | -0.54            | 56   | <i>CDKN2A</i>  | Loss | -2.61            | 179  | <i>STAT6</i>   | Gain | 0.83             |
| 10   | <i>KMT2D</i>   | Loss | -0.65            | 56   | <i>CDKN2B</i>  | Loss | -3.49            | 179  | <i>CDKN2A</i>  | Loss | -3.74            |
| 10   | <i>PRDM1</i>   | Loss | -1.30            | 56   | <i>PRDM1</i>   | Loss | -2.36            | 179  | <i>CDKN2B</i>  | Loss | -3.79            |
| 12   | <i>CDKN2A</i>  | Loss | -0.78            | 61   | <i>BCL7A</i>   | Loss | -0.56            | 180  | <i>BCL2</i>    | Gain | 0.87             |
| 12   | <i>CDKN2B</i>  | Loss | -0.84            | 61   | <i>CDKN2A</i>  | Loss | -3.11            | 180  | <i>BCL7A</i>   | Loss | -0.69            |
| 12   | <i>IGLL5</i>   | Loss | -0.49            | 61   | <i>CDKN2B</i>  | Loss | -2.27            | 180  | <i>CD274</i>   | Gain | 0.74             |
| 12   | <i>PIMI1</i>   | Loss | -0.55            | 61   | <i>IGLL5</i>   | Loss | -1.43            | 180  | <i>CDKN2A</i>  | Loss | -3.09            |
| 12   | <i>PRDM1</i>   | Loss | -0.36            | 61   | <i>PRDM1</i>   | Loss | -0.92            | 180  | <i>CDKN2B</i>  | Loss | -1.34            |
| 12   | <i>SGK1</i>    | Loss | -0.33            | 61   | <i>SGK1</i>    | Loss | -0.70            | 180  | <i>MALT1</i>   | Gain | 0.55             |
| 12   | <i>TNFAIP3</i> | Loss | -0.37            | 61   | <i>TNFAIP3</i> | Loss | -0.90            | 180  | <i>SETBP1</i>  | Gain | 0.69             |
| 22   | <i>CDKN2A</i>  | Loss | -2.48            | 87   | <i>CDKN2A</i>  | Loss | -4.01            | 184  | <i>ARID2</i>   | Loss | -0.75            |
| 22   | <i>CDKN2B</i>  | Loss | -2.33            | 87   | <i>CDKN2B</i>  | Loss | -4.51            | 184  | <i>CDKN2A</i>  | Loss | -2.52            |
| 22   | <i>CSMD1</i>   | Loss | -0.76            | 97   | <i>CDKN2A</i>  | Loss | -3.14            | 184  | <i>CDKN2B</i>  | Loss | -2.35            |
| 22   | <i>ETV6</i>    | Loss | -0.68            | 97   | <i>CDKN2B</i>  | Loss | -1.54            | 184  | <i>CSMD1</i>   | Loss | -0.61            |
| 22   | <i>IGLL5</i>   | Loss | -2.77            | 97   | <i>ETV6</i>    | Loss | -1.54            | 184  | <i>ETV6</i>    | Loss | -0.51            |
| 22   | <i>MEF2B</i>   | Loss | -0.52            | 97   | <i>NFKBIZ</i>  | Gain | 0.47             | 184  | <i>PRDM1</i>   | Loss | -0.82            |
| 22   | <i>PRDM1</i>   | Loss | -0.81            | 114  | <i>CDKN2A</i>  | Loss | -1.05            | 184  | <i>SGK1</i>    | Loss | -1.10            |
| 26   | <i>CDKN2A</i>  | Loss | -0.32            | 114  | <i>CDKN2B</i>  | Loss | -1.66            | 184  | <i>TNFAIP3</i> | Loss | -0.81            |
| 26   | <i>ETV6</i>    | Loss | -0.42            | 114  | <i>MPEG1</i>   | Loss | -0.78            | 189  | <i>MCL1</i>    | Gain | 0.81             |
| 26   | <i>IGLL5</i>   | Loss | -1.69            | 132  | <i>CDKN2A</i>  | Loss | -1.90            | 189  | <i>BRAF</i>    | Gain | 0.38             |
| 26   | <i>MALT1</i>   | Gain | 0.60             | 132  | <i>CDKN2B</i>  | Loss | -1.75            | 189  | <i>STAT6</i>   | Gain | 0.38             |



|           |               |      |       |            |                |      |       |            |                |      |       |
|-----------|---------------|------|-------|------------|----------------|------|-------|------------|----------------|------|-------|
| <b>26</b> | <i>SETBP1</i> | Gain | 0.56  | <b>132</b> | <i>NFKBIZ</i>  | Gain | 0.50  | <b>189</b> | <i>PRDM1</i>   | Loss | -0.75 |
| <b>31</b> | <i>BCL2</i>   | Gain | 0.48  | <b>132</b> | <i>RHOA</i>    | Gain | 0.81  | <b>189</b> | <i>SGK1</i>    | Loss | -0.71 |
| <b>31</b> | <i>CDKN2A</i> | Loss | -1.46 | <b>132</b> | <i>SGK1</i>    | Loss | -0.71 | <b>189</b> | <i>TNFAIP3</i> | Loss | -0.72 |
| <b>31</b> | <i>CDKN2B</i> | Loss | -1.67 | <b>132</b> | <i>TNFAIP3</i> | Loss | -0.91 | <b>197</b> | <i>STAT6</i>   | Gain | 0.63  |
| <b>31</b> | <i>MALT1</i>  | Gain | 0.51  | <b>136</b> | <i>CDKN2A</i>  | Loss | -0.83 | <b>197</b> | <i>CDKN2A</i>  | Loss | -1.04 |
| <b>31</b> | <i>PRDM1</i>  | Loss | -0.56 | <b>136</b> | <i>CDKN2B</i>  | Loss | -0.85 | <b>197</b> | <i>IGLL5</i>   | Loss | -1.11 |
| <b>31</b> | <i>SETBP1</i> | Gain | 0.53  | <b>136</b> | <i>PRDM1</i>   | Loss | -0.50 | <b>204</b> | <i>CDKN2A</i>  | Loss | -4.93 |
| <b>31</b> | <i>TMSB4X</i> | Gain | 0.96  | <b>136</b> | <i>SGK1</i>    | Loss | -0.79 | <b>204</b> | <i>CDKN2B</i>  | Loss | -2.11 |
| <b>39</b> | <i>CD274</i>  | Gain | 0.68  | <b>136</b> | <i>TNFAIP3</i> | Loss | -0.38 | <b>204</b> | <i>CREBBP</i>  | Loss | -0.80 |
| <b>39</b> | <i>CDKN2A</i> | Loss | -3.86 | <b>137</b> | <i>SGK1</i>    | Loss | -0.79 | <b>204</b> | <i>IGLL5</i>   | Loss | -1.19 |
| <b>39</b> | <i>CDKN2B</i> | Loss | -4.63 | <b>139</b> | <i>CDKN2A</i>  | Loss | -2.85 | <b>204</b> | <i>PRDM1</i>   | Loss | -0.90 |
| <b>39</b> | <i>ETV6</i>   | Loss | -2.81 | <b>139</b> | <i>CDKN2B</i>  | Loss | -3.62 | <b>204</b> | <i>SGK1</i>    | Loss | -0.93 |
| <b>39</b> | <i>IGLL5</i>  | Loss | -0.86 | <b>139</b> | <i>ETV6</i>    | Loss | -0.57 | <b>204</b> | <i>TNFAIP3</i> | Loss | -1.11 |

Abbreviations: CNA, copy number alteration

**Table S4.** Relationship between *ETV6* loss and clinical findings

| Factors                                      | <i>ETV6</i> loss   |                    | p-value |
|----------------------------------------------|--------------------|--------------------|---------|
|                                              | Positive (n = 8)   | Negative (n = 27)  |         |
| Sex, male/female                             | 3/5                | 11/16              | 1       |
| Age, median (range), years                   | 71.5 (45–83)       | 69 (43–84)         | 0.70    |
| Laterality, unilateral/bilateral             | 3/5                | 12/15              | 1       |
| IL-10 level (pg/mL), median (range)          | 890 (17–5005)      | 1008 (10–130,125)  | 0.50    |
| IL-10/IL-6 ratio                             | 12.6 (0.29–98.1)   | 15.6 (0.46–1161.8) | 0.26    |
| Cytopathology positive (class $\geq$ IIIb)   | 6/2                | 17/10              | 0.69    |
| Detection of B-cell clonality (FCM analysis) | 5/1                | 18/6               | 1       |
| Positive for <i>IGH</i> rearrangement (PCR)  | 8/0                | 20/6               | 0.30    |
| WBC (/ $\mu$ L), median (range)              | 5950 (4500–13,000) | 6200 (3600–12,400) | 0.84    |
| ANC (/ $\mu$ L), median (range)              | 3735 (2547–10,946) | 4018 (2051–11,284) | 0.95    |
| ALC (/ $\mu$ L), median (range)              | 1905 (1363–2539)   | 1488 (792–3834)    | 0.24    |
| LDH (U/L), median (range)                    | 220.5 (163–376)    | 199 (141–274)      | 0.38    |
| sIL-2R (U/mL), median (range)                | 269.5 (208.4–4040) | 321 (107–762)      | 0.40    |
| CRP (mg/dL), median (range)                  | 0.06 (0.02–0.48)   | 0.05 (0.02–0.54)   | 0.41    |

p-values < 0.05 were considered statistically significant.

Abbreviations: ALC, absolute lymphocyte count; ANC, absolute neutrophil count; CRP, C-reactive protein; FCM, flow cytometry; IL, interleukin; LDH, lactate dehydrogenase; PCR, polymerase chain reaction; sIL-2R, soluble interleukin-2 receptor, WBC, white blood cell

**Table S5.** Relationship between *PRDMI* alteration and clinical findings

| Factors                                          | <i>PRDMI</i> alteration |                    | p-value |
|--------------------------------------------------|-------------------------|--------------------|---------|
|                                                  | Positive (n = 17)       | Negative (n = 18)  |         |
| Sex, male/female                                 | 9/8                     | 5/13               | 0.18    |
| Age, median (range), years                       | 72 (45–83)              | 69.5 (43–84)       | 0.47    |
| Laterality, unilateral/bilateral                 | 5/12                    | 10/8               | 0.18    |
| IL-10 level (pg/mL), median (range)              | 738 (137–130,125)       | 1192 (10–10,596)   | 0.64    |
| IL-10/IL-6 ratio                                 | 17.4 (1.2–1161.8)       | 13.0 (0.29–190.6)  | 0.22    |
| Cytopathology positive (class $\geq$ IIIb)       | 12/5                    | 11/7               | 0.73    |
| B-cell clonality (FCM analysis)                  | 11/4                    | 12/3               | 1       |
| Positive for <i>IGH</i> gene rearrangement (PCR) | 12/4                    | 16/2               | 0.39    |
| WBC (/ $\mu$ L), median (range)                  | 6000 (4100–13000)       | 6200 (3600–12,400) | 0.87    |
| ANC (/ $\mu$ L), median (range)                  | 3870 (2378–10946)       | 3959 (2051–11,284) | 0.88    |
| ALC (/ $\mu$ L), median (range)                  | 1488 (968–2539)         | 1632.5 (792–3834)  | 0.82    |
| LDH (U/L), median (range)                        | 199 (157–376)           | 212.5 (141–274)    | 0.88    |
| sIL-2R (U/mL), median (range)                    | 287.1 (125–4040)        | 341.5 (107–762)    | 0.31    |
| CRP (mg/dL), median (range)                      | 0.04 (0.02–0.48)        | 0.065 (0.02–0.54)  | 0.69    |

p-values < 0.05 were considered statistically significant.

Abbreviations: ALC, absolute lymphocyte count; ANC, absolute neutrophil count; CRP, C-reactive protein; FCM, flow cytometry; IL, interleukin; LDH, lactate dehydrogenase; PCR, polymerase chain reaction; sIL-2R, soluble interleukin-2 receptor; WBC, white blood cell

**Table S6.** Pathogenic gene alteration in primary vitreoretinal lymphoma patients with central nervous system progression

| Case | Vitreous humor |               |             |              |              | Brain           |               |             |                   |       |
|------|----------------|---------------|-------------|--------------|--------------|-----------------|---------------|-------------|-------------------|-------|
|      | Gene           | Mutation type | cDNA change | AA change    | VAF          | Gene            | Mutation type | cDNA change | AA change         | VAF   |
| 39   | <i>MYD88</i>   | Missense      | c.794T>C    | p.Leu265Pro  | 39.48        | <i>MYD88</i>    | Missense      | c.794T>C    | p.Leu265Pro       | 90.42 |
|      | <i>KMT2D</i>   | Nonsense      | c.12844C>T  | p.Arg4282Ter | 34.29        | <i>KMT2D</i>    | Nonsense      | c.12844C>T  | p.Arg4282Ter      | 70.33 |
|      | <i>CD274</i>   |               |             | Gain         |              | <i>CD274</i>    |               |             | Gain              |       |
|      | <i>CDKN2A</i>  |               |             | Loss         |              | <i>CDKN2A</i>   |               |             | Loss              |       |
|      | <i>CDKN2B</i>  |               |             | Loss         |              | <i>CDKN2B</i>   |               |             | Loss              |       |
|      | <i>IGLL5</i>   |               |             | Loss         |              | <i>IGLL5</i>    |               |             | Loss              |       |
|      | <i>ETV6</i>    |               |             | Loss         |              |                 |               | -           |                   |       |
|      |                |               |             | -            |              | <i>ACTB</i>     |               |             | Gain              |       |
|      |                |               |             | -            |              | <i>CD58</i>     | Frameshift    | c.218delC   | p.Ala73ValfsTer11 | 91.62 |
|      |                |               |             | -            |              | <i>IRF4</i>     | Missense      | c.170C>T    | p.Ala57Val        | 64.48 |
|      |                |               |             | -            |              | <i>HIST1H1C</i> | Missense      | c.347C>G    | p.Ala116Gly       | 94.51 |
|      |                |               |             | -            |              | <i>HIST1H4H</i> | Missense      | c.28G>T     | p.Gly10Cys        | 34.31 |
|      |                |               |             | -            |              | <i>MYC</i>      | Missense      | c.63C>G     | p.Ser21Arg        | 63.02 |
|      |                |               |             | -            |              | <i>MYC</i>      | Missense      | c.106C>T    | p.Pro36Ser        | 63.35 |
|      |                |               |             | -            |              | <i>MYC</i>      | Missense      | c.650G>C    | p.Ser217Thr       | 62.87 |
|      |                |               |             | -            |              | <i>CD79B</i>    | Missense      | c.589T>C    | p.Tyr197His       | 57.61 |
|      |                |               | -           |              | <i>BRAF</i>  |                 |               | Gain        |                   |       |
|      |                |               | -           |              | <i>STAT6</i> |                 |               | Gain        |                   |       |
|      |                |               | -           |              | <i>B2M</i>   |                 |               | Loss        |                   |       |
| 56   | <i>ACTB</i>    | Missense      | c.137G>C    | p.Gly46Ala   | 33.64        | <i>ACTB</i>     | Missense      | c.137G>C    | p.Gly46Ala        | 40.37 |
|      | <i>CD79B</i>   | Missense      | c.590A>C    | p.Tyr197Ser  | 34.32        | <i>CD79B</i>    | Missense      | c.590A>C    | p.Tyr197Ser       | 39.56 |
|      | <i>MYD88</i>   | Missense      | c.794T>C    | p.Leu265Pro  | 43.04        | <i>MYD88</i>    | Missense      | c.794T>C    | p.Leu265Pro       | 40.16 |
|      | <i>BTG1</i>    | Missense      | c.400A>T    | p.Thr134Ser  | 50.12        | <i>BTG1</i>     | Missense      | c.400A>T    | p.Thr134Ser       | 39.05 |
|      | <i>BTG1</i>    | Missense      | c.160C>T    | p.His54Tyr   | 57.03        | <i>BTG1</i>     | Missense      | c.160C>T    | p.His54Tyr        | 38.59 |
|      | <i>BTG1</i>    | Nonsense      | c.168G>A    | p.Trp56Ter   | 57.03        | <i>BTG1</i>     | Nonsense      | c.168G>A    | p.Trp56Ter        | 38.59 |
|      | <i>BTG1</i>    | Missense      | c.8C>T      | p.Pro3Leu    | 26.63        | <i>BTG1</i>     | Missense      | c.8C>T      | p.Pro3Leu         | 35.94 |
|      | <i>PRDMI</i>   |               |             | Loss         |              | <i>PRDMI</i>    |               |             | Loss              |       |
|      | <i>CDKN2A</i>  |               |             | Loss         |              | <i>CDKN2A</i>   |               |             | Loss              |       |
|      | <i>CDKN2B</i>  |               |             | Loss         |              | <i>CDKN2B</i>   |               |             | Loss              |       |
|      | <i>PIMI</i>    | Nonsense      | c.382C>T    | p.Gln128Ter  | 55.11        |                 |               | -           |                   |       |

|           |               |            |                                         |                    |       |                 |            |                                     |                    |       |
|-----------|---------------|------------|-----------------------------------------|--------------------|-------|-----------------|------------|-------------------------------------|--------------------|-------|
|           | <i>KMT2D</i>  |            |                                         | Loss               |       |                 |            |                                     | -                  |       |
|           | <i>BCL7A</i>  |            |                                         | Loss               |       |                 |            |                                     | -                  |       |
|           |               |            |                                         | -                  |       | <i>BTG1</i>     | Missense   | c.316G>A                            | p.Val106Ile        | 42.37 |
|           |               |            |                                         | -                  |       | <i>GNAI3</i>    | Nonsense   | c.79C>T                             | p.Gln27Ter         | 41.29 |
| <b>82</b> | <i>SOCS1</i>  | Frameshift | c.312_330delCG<br>ACAGCCGCCA<br>GCGGAAC | p.Asp105AlafsTer7  | 23.05 | <i>SOCS1</i>    | Frameshift | c.312_330delCGACAGC<br>CGCCAGCGGAAC | p.Asp105AlafsTer7  | 49.62 |
|           |               |            |                                         | -                  |       | <i>MYD88</i>    |            |                                     | Gain               |       |
|           |               |            |                                         | -                  |       | <i>RHOA</i>     |            |                                     | Gain               |       |
|           |               |            |                                         | -                  |       | <i>TET2</i>     |            |                                     | Loss               |       |
|           |               |            |                                         | -                  |       | <i>FAT4</i>     |            |                                     | Loss               |       |
|           |               |            |                                         | -                  |       | <i>FBXW7</i>    |            |                                     | Loss               |       |
|           |               |            |                                         | -                  |       | <i>FAT1</i>     |            |                                     | Loss               |       |
|           |               |            |                                         | -                  |       | <i>CDKN2A</i>   |            |                                     | Loss               |       |
|           |               |            |                                         | -                  |       | <i>CDKN2B</i>   |            |                                     | Loss               |       |
|           |               |            |                                         | -                  |       | <i>IGLL5</i>    |            |                                     | Loss               |       |
|           |               |            |                                         | -                  |       | <i>MYD88</i>    | Missense   | c.794T>C                            | p.Leu265Pro        | 42.32 |
|           |               |            |                                         | -                  |       | <i>HIST1H1E</i> | Missense   | c.536C>T                            | p.Ala179Val        | 24.25 |
|           |               |            |                                         | -                  |       | <i>PIM1</i>     | Splice     | c.356-1G>A                          |                    | 40.08 |
|           |               |            |                                         | -                  |       | <i>PRDM1</i>    | Nonsense   | c.1230C>A                           | p.Tyr410Ter        | 78.49 |
|           |               |            |                                         | -                  |       | <i>ACTB</i>     | Missense   | c.585G>C                            | p.Glu195Asp        | 31.11 |
|           |               |            |                                         | -                  |       | <i>CSMD1</i>    | Splice     | c.86-2A>G                           |                    | 26.09 |
|           |               |            |                                         | -                  |       | <i>BTG1</i>     | Missense   | c.136G>A                            | p.Glu46Lys         | 38.39 |
|           |               |            |                                         | -                  |       | <i>IGLL5</i>    | Splice     | c.206+1G>C                          |                    | 37.45 |
| <b>97</b> | <i>PIM1</i>   | Nonsense   | c.720G>A                                | p.Trp240Ter        | 41.68 | <i>PIM1</i>     | Nonsense   | c.720G>A                            | p.Trp240Ter        | 44.93 |
|           | <i>PIM1</i>   | Nonsense   | c.908G>A                                | p.Trp303Ter        | 41.99 | <i>PIM1</i>     | Nonsense   | c.908G>A                            | p.Trp303Ter        | 43.76 |
|           | <i>GRHPR</i>  | Splice     | c.287+1G>A                              |                    | 36.71 | <i>GRHPR</i>    | Splice     | c.287+1G>A                          |                    | 47.28 |
|           | <i>KMT2D</i>  | Frameshift | c.15891_15895dup<br>pGGTGC              | p.His5299ArgfsTer8 | 37.80 | <i>KMT2D</i>    | Frameshift | c.15891_15895dupGGTG<br>C           | p.His5299ArgfsTer8 | 52.79 |
|           | <i>CD79B</i>  | Missense   | c.590A>G                                | p.Tyr197Cys        | 33.35 | <i>CD79B</i>    | Missense   | c.590A>G                            | p.Tyr197Cys        | 37.82 |
|           | <i>BTG2</i>   | Splice     | c.142+1G>C                              |                    | 30.43 | <i>BTG2</i>     | Splice     | c.142+1G>C                          |                    | 39.49 |
|           | <i>MYD88</i>  | Missense   | c.794T>C                                | p.Leu265Pro        | 33.06 | <i>MYD88</i>    | Missense   | c.794T>C                            | p.Leu265Pro        | 47.34 |
|           | <i>MPEG1</i>  | Nonsense   | c.556C>T                                | p.Gln186Ter        | 29.55 | <i>MPEG1</i>    | Nonsense   | c.556C>T                            | p.Gln186Ter        | 42.65 |
|           | <i>PRDM1</i>  | Splice     | c.291G>C                                | p.Glu97Asp         | 51.92 | <i>PRDM1</i>    | Missense   | c.291G>C                            | p.Glu97Asp         | 78.68 |
|           | <i>CDKN2A</i> |            |                                         | Loss               |       | <i>CDKN2A</i>   |            |                                     | Loss               |       |

|               |          |            |             |       |               |          |                           |                   |
|---------------|----------|------------|-------------|-------|---------------|----------|---------------------------|-------------------|
| <i>CDKN2B</i> | Loss     |            |             |       | <i>CDKN2B</i> | Loss     |                           |                   |
| <i>PIM1</i>   | Nonsense | c.652C>T   | p.Gln218Ter | 80.38 | -             |          |                           |                   |
| <i>GRHRP</i>  | Splice   | c.214+1G>A |             | 41.75 | -             |          |                           |                   |
| <i>ETV6</i>   | Loss     |            |             |       | -             |          |                           |                   |
| <i>NFKBIZ</i> | Gain     |            |             |       | -             |          |                           |                   |
| -             |          |            |             |       | <i>PIM1</i>   | Splice   | c.356-9 357delCTTTCCTAGGC | 29.60             |
| -             |          |            |             |       | <i>MYC</i>    | Missense | c.486G>T                  | p.Glu162Asp 48.26 |
| -             |          |            |             |       | <i>STAT6</i>  | Gain     |                           |                   |
| -             |          |            |             |       | <i>IGLL5</i>  | Loss     |                           |                   |

Abbreviations: AA, amino acid; CNS, central nervous system; VAF, variant allele frequency

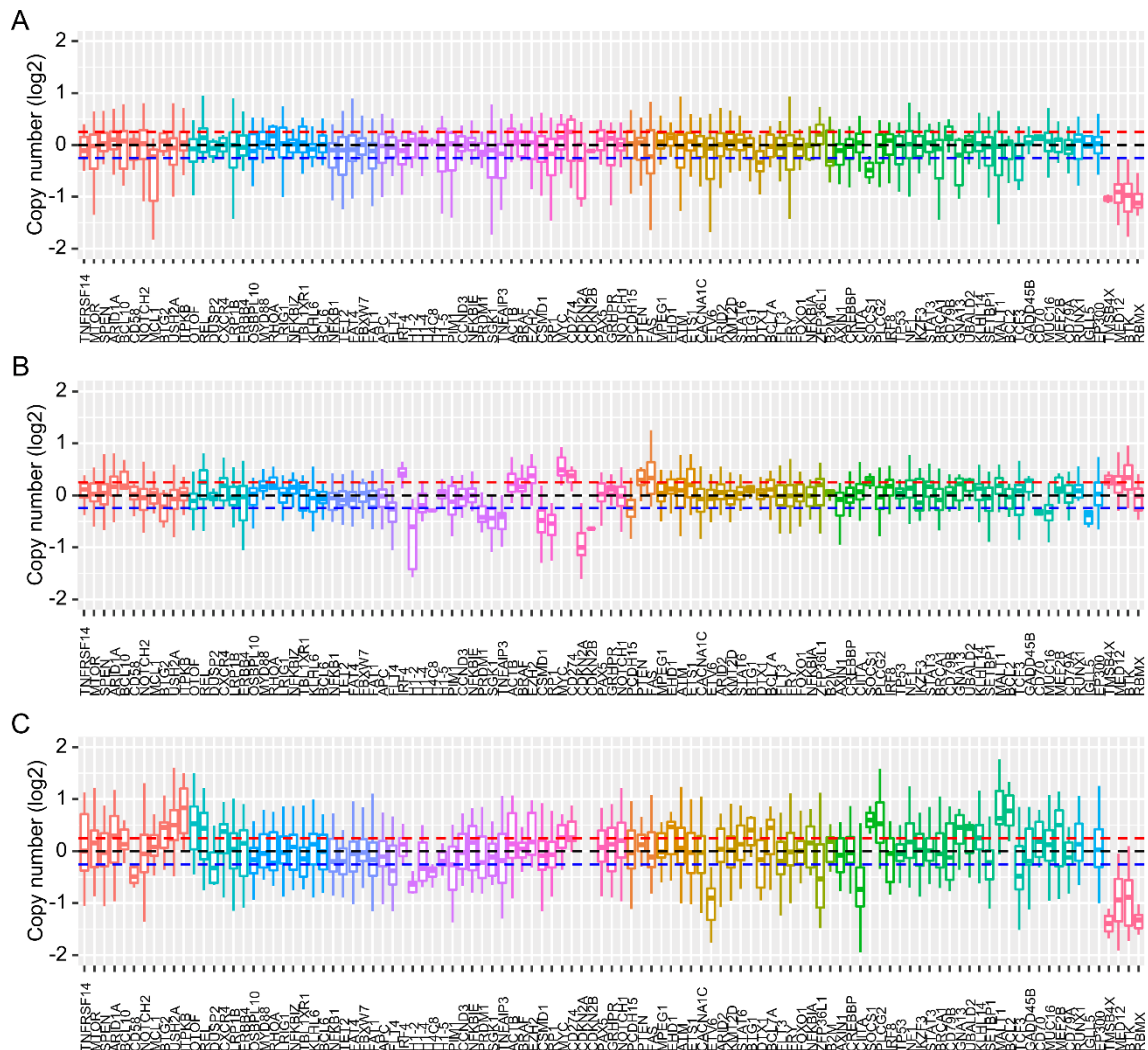

**Supplemental Figure 1. Representative copy number plot.** Copy numbers of each amplicon were shown as boxplot organized by the gene level. Results of uveitis sample (control) and two PVRL cases (Case 1 and 49) are shown in (A) and (B) and (C), respectively. Black dotted line indicates copy number neutral value. Red and blue dotted lines are thresholds for gain and loss, respectively.

### Supplementary references

1. Levy N, Nelson J, Meyer P, Lukes RJ, Parker JW. Reactive lymphoid hyperplasia with single class (monoclonal) surface immunoglobulin. *Am J Clin Pathol.* 1983;80(3):300-308.
2. Bolger AM, Lohse M, Usadel B. Trimmomatic: a flexible trimmer for Illumina sequence data. *Bioinformatics.* 2014;30(15):2114-2120.
3. Li H, Durbin R. Fast and accurate short read alignment with Burrows-Wheeler transform. *Bioinformatics.* 2009;25(14):1754-1760.
4. Okonechnikov K, Conesa A, Garcia-Alcalde F. Qualimap 2: advanced multi-sample quality control for high-throughput sequencing data. *Bioinformatics.* 2016;32(2):292-294.
5. McKenna A, Hanna M, Banks E, et al. The Genome Analysis Toolkit: a MapReduce framework for analyzing next-generation DNA sequencing data. *Genome Res.* 2010;20(9):1297-1303.
6. Najima Y, Sadato D, Harada Y, et al. Prognostic impact of TP53 mutation, monosomal karyotype, and prior myeloid disorder in nonremission acute myeloid leukemia at allo-HSCT. *Bone Marrow Transplant.* 2021;56(2):334-346.
7. Talevich E, Shain AH, Botton T, Bastian BC. CNVkit: Genome-Wide Copy Number Detection and Visualization from Targeted DNA Sequencing. *PLoS Comput Biol.* 2016;12(4):e1004873.
8. Lohr JG, Stojanov P, Lawrence MS, et al. Discovery and prioritization of somatic mutations in diffuse large B-cell lymphoma (DLBCL) by whole-exome sequencing. *Proc Natl Acad Sci U S A.* 2012;109(10):3879-3884.
9. Wang X, Su W, Gao Y, et al. A pilot study of the use of dynamic analysis of cell-free DNA from aqueous humor and vitreous fluid for the diagnosis and treatment monitoring of vitreoretinal lymphomas. *Haematologica.* 2022;107(9):2154-2162.
10. Zhang F, Lu YJ, Malley R. Multiple antigen-presenting system (MAPS) to induce comprehensive B- and T-cell immunity. *Proc Natl Acad Sci U S A.* 2013;110(33):13564-13569.
11. Schmitz R, Wright GW, Huang DW, et al. Genetics and Pathogenesis of Diffuse Large B-Cell Lymphoma. *N Engl J Med.* 2018;378(15):1396-1407.
12. Challa-Malladi M, Lieu YK, Califano O, et al. Combined genetic inactivation of beta2-Microglobulin and CD58 reveals frequent escape from immune recognition in diffuse large B cell lymphoma. *Cancer Cell.* 2011;20(6):728-740.
13. Morin RD, Mendez-Lago M, Mungall AJ, et al. Frequent mutation of histone-modifying genes in non-Hodgkin lymphoma. *Nature.* 2011;476(7360):298-303.
14. Balinas-Gavira C, Rodriguez MI, Andrades A, et al. Frequent mutations in the amino-terminal domain of BCL7A impair its tumor suppressor role in DLBCL. *Leukemia.* 2020;34(10):2722-2735.
15. Lee J, Kim B, Lee H, et al. Whole exome sequencing identifies mutational signatures of vitreoretinal lymphoma. *Haematologica.* 2020;105(9):e458-460.
16. Bonzheim I, Sander P, Salmeron-Villalobos J, et al. The molecular hallmarks of primary and



secondary vitreoretinal lymphoma. *Blood Adv.* 2022;6(5):1598-1607.

17. Mlynarczyk C, Teater M, Pae J, et al. BTG1 mutation yields supercompetitive B cells primed for malignant transformation. *Science.* 2023;379(6629):eabj7412.
18. Hu N, Wang F, Sun T, et al. Follicular Lymphoma-associated BTK Mutations are Inactivating Resulting in Augmented AKT Activation. *Clin Cancer Res.* 2021;27(8):2301-2313.
19. Schmitz R, Young RM, Ceribelli M, et al. Burkitt lymphoma pathogenesis and therapeutic targets from structural and functional genomics. *Nature.* 2012;490(7418):116-120.
20. Kataoka K, Shiraishi Y, Takeda Y, et al. Aberrant PD-L1 expression through 3'-UTR disruption in multiple cancers. *Nature.* 2016;534(7607):402-406.
21. Davis RE, Ngo VN, Lenz G, et al. Chronic active B-cell-receptor signalling in diffuse large B-cell lymphoma. *Nature.* 2010;463(7277):88-92.
22. Nayyar N, White MD, Gill CM, et al. MYD88 L265P mutation and CDKN2A loss are early mutational events in primary central nervous system diffuse large B-cell lymphomas. *Blood Adv.* 2019;3(3):375-383.
23. Mottok A, Woolcock B, Chan FC, et al. Genomic Alterations in CIITA Are Frequent in Primary Mediastinal Large B Cell Lymphoma and Are Associated with Diminished MHC Class II Expression. *Cell Rep.* 2015;13(7):1418-1431.
24. Escudero-Esparza A, Bartoschek M, Gialeli C, et al. Complement inhibitor CSMD1 acts as tumor suppressor in human breast cancer. *Oncotarget.* 2016;7(47):76920-76933.
25. Treon SP, Tripsas CK, Meid K, et al. Ibrutinib in previously treated Waldenstrom's macroglobulinemia. *N Engl J Med.* 2015;372(15):1430-1440.
26. de Miranda NF, Georgiou K, Chen L, et al. Exome sequencing reveals novel mutation targets in diffuse large B-cell lymphomas derived from Chinese patients. *Blood.* 2014;124(16):2544-2553.
27. Bonetti P, Testoni M, Scandurra M, et al. Deregulation of ETS1 and FLI1 contributes to the pathogenesis of diffuse large B-cell lymphoma. *Blood.* 2013;122(13):2233-2241.
28. Gronbaek K, Straten PT, Ralfkiaer E, et al. Somatic Fas mutations in non-Hodgkin's lymphoma: association with extranodal disease and autoimmunity. *Blood.* 1998;92(9):3018-3024.
29. Laginestra MA, Cascione L, Motta G, et al. Whole exome sequencing reveals mutations in FAT1 tumor suppressor gene clinically impacting on peripheral T-cell lymphoma not otherwise specified. *Mod Pathol.* 2020;33(2):179-187.
30. Cai J, Feng D, Hu L, et al. FAT4 functions as a tumour suppressor in gastric cancer by modulating Wnt/beta-catenin signalling. *Br J Cancer.* 2015;113(12):1720-1729.
31. Liu N, Gao M. FLT4 Mutations Are Associated with Segmental Lymphatic Dysfunction and Initial Lymphatic Aplasia in Patients with Milroy Disease. *Genes (Basel).* 2021;12(10):
32. Trinh DL, Scott DW, Morin RD, et al. Analysis of FOXO1 mutations in diffuse large B-cell lymphoma. *Blood.* 2013;121(18):3666-3674.

33. Mai Z, Yuan J, Yang H, et al. Inactivation of Hippo pathway characterizes a poor-prognosis subtype of esophageal cancer. *JCI Insight*. 2022;7(16):
34. Muppidi JR, Schmitz R, Green JA, et al. Loss of signalling via Galpha13 in germinal centre B-cell-derived lymphoma. *Nature*. 2014;516(7530):254-258.
35. Andrades A, Alvarez-Perez JC, Patino-Mercau JR, Cuadros M, Balinas-Gavira C, Medina PP. Recurrent splice site mutations affect key diffuse large B-cell lymphoma genes. *Blood*. 2022;139(15):2406-2410.
36. Li H, Kaminski MS, Li Y, et al. Mutations in linker histone genes HIST1H1 B, C, D, and E; OCT2 (POU2F2); IRF8; and ARID1A underlying the pathogenesis of follicular lymphoma. *Blood*. 2014;123(10):1487-1498.
37. Cherian MA, Olson S, Sundaramoorthi H, et al. An activating mutation of interferon regulatory factor 4 (IRF4) in adult T-cell leukemia. *J Biol Chem*. 2018;293(18):6844-6858.
38. Reddy A, Zhang J, Davis NS, et al. Genetic and Functional Drivers of Diffuse Large B Cell Lymphoma. *Cell*. 2017;171(2):481-494 e415.
39. Choi J, Phelan JD, Wright GW, et al. Regulation of B cell receptor-dependent NF-kappaB signaling by the tumor suppressor KLHL14. *Proc Natl Acad Sci U S A*. 2020;117(11):6092-6102.
40. Pon JR, Wong J, Saberi S, et al. MEF2B mutations in non-Hodgkin lymphoma dysregulate cell migration by decreasing MEF2B target gene activation. *Nat Commun*. 2015;6(7953).
41. Weniger MA, Kuppers R. Molecular biology of Hodgkin lymphoma. *Leukemia*. 2021;35(4):968-981.
42. Dobashi A, Togashi Y, Tanaka N, et al. TP53 and OSBPL10 alterations in diffuse large B-cell lymphoma: prognostic markers identified via exome analysis of cases with extreme prognosis. *Oncotarget*. 2018;9(28):19555-19568.
43. Gu Z, Churchman ML, Roberts KG, et al. PAX5-driven subtypes of B-progenitor acute lymphoblastic leukemia. *Nat Genet*. 2019;51(2):296-307.
44. Zheng T, Zhou H, Li X, et al. RBMX is required for activation of ATR on repetitive DNAs to maintain genome stability. *Cell Death Differ*. 2020;27(11):3162-3176.
45. Koskela HL, Eldfors S, Ellonen P, et al. Somatic STAT3 mutations in large granular lymphocytic leukemia. *N Engl J Med*. 2012;366(20):1905-1913.
46. Yildiz M, Li H, Bernard D, et al. Activating STAT6 mutations in follicular lymphoma. *Blood*. 2015;125(4):668-679.
47. Venturutti L, Teater M, Zhai A, et al. TBL1XR1 Mutations Drive Extranodal Lymphoma by Inducing a Pro-tumorigenic Memory Fate. *Cell*. 2020;182(2):297-316 e227.
48. Kato M, Sanada M, Kato I, et al. Frequent inactivation of A20 in B-cell lymphomas. *Nature*. 2009;459(7247):712-716.
49. Wu F, Watanabe N, Tzioni MM, et al. Thyroid MALT lymphoma: self-harm to gain potential T-

cell help. *Leukemia*. 2021;35(12):3497-3508.
